# Supplementary material for: Mechanical nociceptive assessment of the equine hoof following distal interphalangeal joint intra-articular anesthesia
Source: PeerJ. 2020 Aug 11;8:e9469. doi: 10.7717/peerj.9469 (PMC7427544; doi:10.7717/peerj.9469)
Supplement: Data S1 [file peerj-08-9469-s001.xlsx]

## Sheet: Planilha1
values expressed in kg
Animal	Time	Treatment	Heel bulbs lateral	Coronary band lateral	Coronary band dorsal	Coronary band medial	Heel bulbs medial	Lamina 2 cm	Lamina 4 cm	Sole dorsal	Sole medial	Sole lateral			Animal	Time	Treatment	Heel bulbs lateral	Coronary band lateral	Coronary band dorsal	Coronary band medial	Heel bulbs medial	Lamina 2 cm	Lamina 4 cm	Sole dorsal	Sole medial	Sole lateral
1	0''	Lidocaine	0.55	0.58	0.785	0.53	0.53	0.405	0.365	0.56	0.155	0.335			1	0''	Ringers L.	0.675	0.6	0.54	0.465	0.655	0.575	0.56	0.805	0.815	0.725
1	5''	Lidocaine	0.445	0.626667	0.3	0.445	0.445	0.26	0.18	0.675	0.705	0.52			1	5''	Ringers L.	0.335	0.535	0.335	0.505	0.43	0.36	0.46	0.7	0.625	0.495
1	10''	Lidocaine	0.51	0.575	0.9	0.605	0.605	0.43	0.31	0.5	0.515	0.445			1	10''	Ringers L.	0.51	0.55	0.415	0.505	0.595	0.365	0.425	0.715	0.75	0.65
1	15''	Lidocaine	0.315	0.73	0.59	0.455	0.455	0.505	0.355	0.675	0.345	0.58			1	15''	Ringers L.	0.54	0.61	0.58	0.49	0.545	0.38	0.535	0.62	0.525	0.625
1	20''	Lidocaine	0.52	0.53	0.425	0.485	0.485	0.385	0.265	0.72	0.52	0.485			1	20''	Ringers L.	0.415	0.53	0.56	0.65	0.495	0.32	0.595	1	0.81	0.465
1	30''	Lidocaine	0.445	0.65	0.52	0.395	0.395	0.37	0.34	0.665	0.375	0.76			1	30''	Ringers L.	0.425	0.57	0.73	0.435	0.405	0.28	0.465	0.88	0.85	0.455
1	01:00:00	Lidocaine	0.545	0.576667	0.22	0.665	0.665	1.96333	6	1.435	6	2.11667			1	01:00:00	Ringers L.	0.34	0.45	0.39	0.65	0.555	0.27	0.505	0.61	0.665	0.42
1	01:30:00	Lidocaine	0.65	0.786667	1.145	0.53	0.53	0.46	0.34	0.92	0.345	0.725			1	01:30:00	Ringers L.	0.425	0.49	0.55	0.67	0.49	0.435	0.795	0.57	0.73	0.53
1	02:00:00	Lidocaine	0.395	0.505	0.65	0.59	0.59	0.36	0.255	0.635	0.365	0.625			1	02:00:00	Ringers L.	0.655	0.785	0.55	0.81	0.665	0.355	0.535	0.55	0.55	0.35
1	02:30:00	Lidocaine	0.43	0.625	0.865	0.39	0.39	0.355	0.26	0.795	0.23	0.585			1	02:30:00	Ringers L.	0.845	0.705	0.88	0.805	0.79	0.34	0.785	0.68	0.575	0.45
1	03:00:00	Lidocaine	0.315	0.41	0.46	0.43	0.43	0.385	0.25	0.63	0.17	0.47			1	03:00:00	Ringers L.	0.8	0.56	0.405	0.865	0.97	0.405	0.42	0.58	0.565	0.685
1	03:30:00	Lidocaine	0.353333	0.21	0.32	0.34	0.39	0.4	0.215	0.44	0.185	0.44			1	03:30:00	Ringers L.	0.455	0.62	0.37	0.425	0.61	0.345	0.43	0.635	0.635	0.49
1	04:00:00	Lidocaine	0.385	0.325	0.465	0.23	0.375	0.465	0.275	0.64	0.24	0.33			1	04:00:00	Ringers L.	0.56	0.535	0.47	0.64	0.575	0.375	0.435	0.7	0.68	0.5
3	0''	Lidocaine	0.2775	0.27	0.34	0.253333	0.26	0.516667	0.25	0.41	0.6	0.43			3	0''	Ringers L.	0.296667	0.235	0.296667	0.225	0.25	0.25	0.19	0.62	0.435	0.455
3	5''	Lidocaine	0.37	0.366667	0.38	0.32	0.32	0.753333	0.455	0.61	0.71	0.67			3	5''	Ringers L.	0.13	0.215	0.31	0.275	0.225	0.43	0.35	0.415	0.515	0.61
3	10''	Lidocaine	0.37	0.506667	0.295	0.193333	0.255	0.57	0.336667	0.665	0.545	0.57			3	10''	Ringers L.	0.28	0.305	0.235	0.175	0.245	0.25	0.31	0.385	0.35	0.425
3	15''	Lidocaine	0.35	0.395	0.4575	0.415	0.33	0.41	0.3	0.535	0.55	0.47			3	15''	Ringers L.	_	_	_	_	_	0.3	0.21	0.385	0.395	0.43
3	20''	Lidocaine	0.265	0.29	0.456667	0.48	0.38	0.465	0.335	0.48	0.43	0.455			3	20''	Ringers L.	0.28	0.38	0.245	0.295	0.345	0.445	0.37	0.415	0.345	0.406667
3	30''	Lidocaine	0.215	0.33	0.32	0.255	0.18	0.375	0.263333	0.47	0.49	0.47			3	30''	Ringers L.	0.345	0.275	0.23	0.295	0.3	0.47	0.415	0.475	0.49	0.465
3	01:00:00	Lidocaine	0.19	0.24	0.235	0.215	0.19	0.23	0.19	0.32	0.31	0.28			3	01:00:00	Ringers L.	0.22	0.21	0.295	0.165	0.21	0.425	0.27	0.48	0.415	0.475
3	01:30:00	Lidocaine	0.21	0.315	0.22	0.25	0.215	0.385	0.295	0.425	0.355	0.36			3	01:30:00	Ringers L.	0.15	0.21	0.24	0.335	0.24	0.26	0.19	0.535	0.435	0.495
3	02:00:00	Lidocaine	0.175	0.39	0.3	0.355	0.17	0.36	0.235	0.315	0.335	0.34			3	02:00:00	Ringers L.	0.265	0.24	0.24	0.265	0.25	0.36	0.255	0.485	0.48	0.37
3	02:30:00	Lidocaine	0.22	0.315	0.24	0.25	0.22	0.325	0.24	0.29	0.315	0.29			3	02:30:00	Ringers L.	0.19	0.24	0.225	0.23	0.21	0.315	0.2	0.605	0.48	0.59
3	03:00:00	Lidocaine	0.225	0.216667	0.24	0.2	0.26	0.335	0.145	0.285	0.325	0.29			3	03:00:00	Ringers L.	0.17	0.285	0.225	0.29	0.2	0.39	0.305	0.465	0.465	0.395
3	03:30:00	Lidocaine	0.22	0.285	0.19	0.155	0.22	0.29	0.22	0.41	0.44	0.47			3	03:30:00	Ringers L.	0.22	0.22	0.21	0.29	0.205	0.256667	0.2	0.33	0.37	0.42
3	04:00:00	Lidocaine	0.125	0.18	0.165	0.175	0.14	0.355	0.235	0.34	0.32	0.385			3	04:00:00	Ringers L.	0.155	0.29	0.22	0.22	0.195	0.295	0.205	0.52	0.42	0.515
4	0''	Lidocaine	0.35	0.573333	0.293333	0.226667	0.256667	0.405	0.23	0.645	0.47	0.63			4	0''	Ringers L.	0.323333	0.3725	0.245	0.305	0.275	0.44	0.515	0.5	0.365	0.465
4	5''	Lidocaine	0.425	0.513333	0.523333	0.99	0.715	0.36	0.28	0.58	0.255	0.38			4	5''	Ringers L.	0.345	0.285	0.21	0.25	0.36	0.583333	0.52	0.47	0.57	0.545
4	10''	Lidocaine	0.57	0.605	0.25	0.4	0.513333	0.485	0.465	0.4	0.385	0.385			4	10''	Ringers L.	0.255	0.27	0.566667	0.41	0.29	0.806667	0.64	0.495	0.375	0.485
4	15''	Lidocaine	0.42	0.77	0.365	0.573333	0.27	0.325	0.385	0.49	0.55	0.395			4	15''	Ringers L.	0.395	0.485	0.285	0.27	0.405	0.68	0.685	0.505	0.45	0.435
4	20''	Lidocaine	0.47	0.883333	0.36	1.7	0.956667	0.335	0.29	0.59	0.535	0.41			4	20''	Ringers L.	0.365	0.295	0.255	0.346667	0.37	0.64	0.465	0.415	0.375	0.426667
4	30''	Lidocaine	1.48	0.84	0.59	1.175	1.075	0.496667	0.345	0.65	0.41	0.42			4	30''	Ringers L.	0.23	0.275	0.23	0.385	0.385	0.305	0.436667	0.485	0.48	0.46
4	01:00:00	Lidocaine	1.43333	1.14333	1.305	0.925	1.53	0.49	0.385	0.75	0.62	0.625			4	01:00:00	Ringers L.	0.265	0.215	0.23	0.255	0.33	0.343333	0.45	0.535	0.475	0.48
4	01:30:00	Lidocaine	0.53	1.575	0.946667	1.345	1.105	0.45	0.26	0.613333	0.39	0.46			4	01:30:00	Ringers L.	0.305	0.47	0.425	0.53	0.443333	0.61	0.645	0.51	0.5	0.45
4	02:00:00	Lidocaine	1.01	1.275	0.755	0.9975	0.906667	0.615	0.325	0.68	0.555	0.515			4	02:00:00	Ringers L.	0.226667	0.335	0.36	0.313333	0.33	0.665	0.55	0.605	0.495	0.56
4	02:30:00	Lidocaine	0.493333	1	0.37	0.563333	0.513333	0.425	0.34	0.48	0.53	0.65			4	02:30:00	Ringers L.	0.375	0.355	0.54	0.295	0.4	0.48	0.695	0.57	0.745	0.535
4	03:00:00	Lidocaine	0.42	0.523333	0.325	0.58	0.43	0.41	0.475	0.59	0.555	0.63			4	03:00:00	Ringers L.	0.23	0.35	0.355	0.42	0.24	0.505	0.595	0.46	0.56	0.52
4	03:30:00	Lidocaine	0.516667	0.853333	0.5	0.45	0.555	0.35	0.475	0.59	0.526667	0.51			4	03:30:00	Ringers L.	0.33	0.246667	0.235	0.2	0.336667	0.45	0.3	0.67	0.62	0.54
4	04:00:00	Lidocaine	0.415	0.465	0.303333	0.3	0.52	0.34	0.385	0.57	0.435	0.465			4	04:00:00	Ringers L.	0.275	0.262	0.305	0.255	0.225	0.39	0.475	0.53	0.47	0.485
5	0''	Lidocaine	0.62	0.47	0.425	0.75	0.57	0.215	0.235	0.496667	0.573333	0.345			5	0''	Ringers L.	0.61	0.393333	0.48	0.413333	0.365	0.45	0.25	0.595	0.515	0.485
5	5''	Lidocaine	0.58	0.53	0.63	0.725	0.58	0.24	0.46	0.395	0.495	0.37			5	5''	Ringers L.	0.405	0.575	0.38	0.58	0.39	0.43	0.275	0.53	0.545	0.48
5	10''	Lidocaine	0.65	0.51	0.655	0.775	0.716667	0.68	0.58	0.48	0.5	0.49			5	10''	Ringers L.	0.45	0.595	0.85	0.425	0.47	0.555	0.26	0.56	0.505	0.515
5	15''	Lidocaine	1.105	0.92	0.925	1.225	1.195	4.60333	4.86333	0.795	0.665	0.685			5	15''	Ringers L.	0.425	0.5	0.485	0.51	0.325	0.38	0.265	0.495	0.425	0.42
5	20''	Lidocaine	1.115	0.835	0.715	1.01	1.305	3	6	0.765	0.575	0.715			5	20''	Ringers L.	0.5	0.515	0.53	0.525	0.456667	0.4	0.27	0.475	0.365	0.405
5	30''	Lidocaine	1.33	1.18	0.855	1.05	1.15	3	6	0.785	0.695	0.81			5	30''	Ringers L.	0.46	0.35	0.51	0.455	0.565	0.31	0.19	0.495	0.47	0.48
5	01:00:00	Lidocaine	1.22333	0.175	0.796667	1.07667	0.79	0.175	0.23	0.37	0.4	0.34			5	01:00:00	Ringers L.	0.515	0.535	0.545	0.505	0.53	0.335	0.15	0.515	0.535	0.435
5	01:30:00	Lidocaine	0.69	0.245	0.605	0.535	0.57	0.2	0.205	0.413333	0.32	0.265			5	01:30:00	Ringers L.	0.38	0.475	0.425	0.425	0.36	0.275	0.185	0.465	0.525	0.415
5	02:00:00	Lidocaine	0.543333	0.33	0.68	0.48	0.535	0.16	0.195	0.385	0.305	0.325			5	02:00:00	Ringers L.	0.54	0.52	0.435	0.505	0.485	0.27	0.155	0.545	0.495	0.4
5	02:30:00	Lidocaine	0.805	0.486667	0.725	0.816667	0.87	0.145	0.18	0.375	0.295	0.315			5	02:30:00	Ringers L.	0.42	0.44	0.51	0.4	0.475	0.27	0.14	0.495	0.42	0.35
5	03:00:00	Lidocaine	0.626667	0.48	0.62	0.88	0.695	0.135	0.275	0.415	0.415	0.315			5	03:00:00	Ringers L.	0.455	0.48	0.415	0.565	0.4	0.286667	0.16	0.505	0.48	0.49
5	03:30:00	Lidocaine	0.585	0.7	0.495	0.615	0.595	0.145	0.22	0.53	0.415	0.38			5	03:30:00	Ringers L.	0.355	0.49	0.62	0.39	0.375	0.405	0.22	0.435	0.575	0.415
5	04:00:00	Lidocaine	0.83	0.7	0.69	0.69	0.746667	0.095	0.18	0.326667	0.38	0.365			5	04:00:00	Ringers L.	0.415	0.38	0.41	0.45	0.44	0.375	0.165	0.33	0.36	0.315
6	0''	Lidocaine	0.21	0.205	0.435	0.34	0.145	0.235	0.275	0.35	0.41	0.405			6	0''	Ringers L.	0.255	0.495	0.315	0.29	0.17	0.875	0.696667	0.405	0.4	0.35
6	5''	Lidocaine	0.26	0.423333	0.75	0.793333	0.38	3.545	0.515	0.295	0.46	0.386667			6	5''	Ringers L.	0.195	0.59	0.1	0.235	0.33	0.87	0.62	0.455	0.405	0.405
6	10''	Lidocaine	0.495	0.525	1.15	0.71	0.405	0.465	0.435	0.826667	0.295	0.455			6	10''	Ringers L.	0.365	0.2	0.435	0.145	0.255	1.60333	0.753333	0.485	0.395	0.35
6	15''	Lidocaine	0.37	0.13	0.65	0.455	0.395	0.756667	0.5	0.34	0.295	0.37			6	15''	Ringers L.	0.47	0.245	0.52	0.305	0.445	1.57	1.175	1.335	1.685	2.385
6	20''	Lidocaine	0.365	0.54	0.625	0.595	0.415	0.505	0.435	0.54	0.49	0.503333			6	20''	Ringers L.	0.385	0.26	0.44	0.325	0.645	2.76	1.04	2.66	1.43	3.145
6	30''	Lidocaine	0.4	0.173333	0.515	0.53	0.445	0.475	0.4	0.51	0.49	0.39			6	30''	Ringers L.	0.64	0.52	0.58	0.16	0.495	1.51	1.57	0.72	0.91	0.905
6	01:00:00	Lidocaine	0.21	0.29	0.545	0.366667	0.42	0.425	0.41	0.55	0.345	0.51			6	01:00:00	Ringers L.	0.51	0.415	0.775	0.625	0.446667	1.285	0.61	1.035	1.125	0.555
6	01:30:00	Lidocaine	0.305	0.325	0.305	0.165	0.41	1.34333	0.4	0.385	0.455	0.455			6	01:30:00	Ringers L.	0.525	0.226667	0.275	0.585	0.42	1.54	1.07	0.82	0.91	0.595
6	02:00:00	Lidocaine	0.225	0.3	0.283333	0.33	0.24	0.86	0.32	0.365	0.395	0.43			6	02:00:00	Ringers L.	0.34	0.49	0.456667	0.25	0.455	1.12	0.72	1.23667	2.33	0.72
6	02:30:00	Lidocaine	0.585	0.71	0.275	0.443333	0.46	1.51	0.43	0.355	0.413333	0.46			6	02:30:00	Ringers L.	0.36	0.4	0.22	0.376667	0.44	0.765	0.666667	1.03	1.435	1.075
6	03:00:00	Lidocaine	0.25	0.23	0.335	0.65	0.33	0.97	0.285	0.28	0.365	0.38			6	03:00:00	Ringers L.	0.31	0.27	0.35	0.495	0.295	0.635	0.57	0.47	0.525	0.62
6	03:30:00	Lidocaine	0.2	0.39	0.67	0.48	0.46	0.63	0.315	0.535	0.495	0.615			6	03:30:00	Ringers L.	0.363333	0.615	0.225	0.39	0.305	0.73	0.535	0.365	0.45	0.425
6	04:00:00	Lidocaine	0.33	0.245	0.21	0.215	0.305	0.625	0.345	0.39	0.345	0.475			6	04:00:00	Ringers L.	_	0.425	0.145	0.31	0.345	1.035	0.51	0.325	0.365	0.345
7	0''	Lidocaine	0.235	0.476667	0.39	0.225	0.62	0.263333	0.256667	0.715	0.44	0.58			7	0''	Ringers L.	0.306667	0.12	0.266667	0.325	0.305	0.483333	0.76	0.61	0.73	0.61
7	5''	Lidocaine	0.21	0.535	0.235	0.296667	0.215	0.27	0.26	0.585	0.45	0.525			7	5''	Ringers L.	0.115	0.29	0.39	0.235	0.15	0.47	0.605	0.675	0.5	0.54
7	10''	Lidocaine	0.266667	0.41	0.325	0.265	0.22	0.74	0.46	0.486667	0.455	0.35			7	10''	Ringers L.	0.16	0.55	0.49	0.263333	0.23	0.406667	0.435	0.445	0.48	0.47
7	15''	Lidocaine	0.395	1.145	1.14	0.396667	0.286667	1.91333	1.295	0.64	0.51	0.6			7	15''	Ringers L.	0.245	0.3	0.33	0.215	0.14	0.475	0.46	0.595	0.565	0.62
7	20''	Lidocaine	0.265	0.425	0.31	0.343333	0.39	6	3.65	0.82	1.08	0.54			7	20''	Ringers L.	0.52	0.205	0.285	0.295	0.27	0.48	0.535	0.62	0.615	0.495
7	30''	Lidocaine	0.26	0.2	0.255	0.37	0.335	5.855	3.29	0.775	0.835	0.925			7	30''	Ringers L.	0.15	0.236667	0.31	0.275	0.11	0.44	0.59	0.43	0.435	0.465
7	01:00:00	Lidocaine	0.21	0.355	0.213333	0.16	0.32	5.365	3.35	0.67	0.725	0.715			7	01:00:00	Ringers L.	0.36	0.43	0.315	0.75	0.325	0.485	0.425	0.735	0.705	0.705
7	01:30:00	Lidocaine	0.293333	0.43	0.205	0.31	0.3	1.98	0.6	0.62	0.53	0.535			7	01:30:00	Ringers L.	0.595	0.67	0.473333	0.885	0.355	0.395	0.565	0.55	0.64	0.595
7	02:00:00	Lidocaine	0.165	0.2	0.265	0.235	0.15	0.27	0.2	0.57	0.56	0.38			7	02:00:00	Ringers L.	0.735	0.605	0.315	0.91	0.86	0.455	0.51	0.59	0.63	0.575
7	02:30:00	Lidocaine	0.15	0.285	0.18	0.25	0.24	0.21	0.165	0.53	0.515	0.47			7	02:30:00	Ringers L.	0.545	0.705	0.415	0.636667	0.715	0.465	0.545	0.46	0.505	0.51
7	03:00:00	Lidocaine	0.15	0.235	0.2	0.135	0.2	0.24	0.21	0.54	0.525	0.42			7	03:00:00	Ringers L.	0.605	0.695	0.775	0.235	0.7	0.42	0.5	0.59	0.515	0.575
7	03:30:00	Lidocaine	0.215	0.33	0.855	0.343333	0.51	0.215	0.255	0.685	0.535	0.35			7	03:30:00	Ringers L.	0.65	0.555	0.855	0.82	0.85	0.31	0.38	0.685	0.655	0.585
7	04:00:00	Lidocaine	0.175	0.22	0.223333	0.215	0.205	0.285	0.18	0.595	0.6	0.58			7	04:00:00	Ringers L.	0.63	0.56	0.45	0.63	0.67	0.37	0.42	0.585	0.765	0.71
